# Supplementary material for: Analysis of deferiprone in exhaled breath condensate using silver nanoparticle-enhanced terbium fluorescence
Source: Royal Society of Chemistry journal article supplement (doi:10.1039/c7ay01715d), 2017-01-01
Supplement: c7ay01715d1.pdf [file c7ay01715d1.pdf]

## Analysis of deferiprone in exhaled breath condensate using silver nanoparticles enhanced terbium fluorescence

Esmail Mohamadian, Ali Shayanfar, Maryam Khoubnasabjafari, Vahid Jouyban-Gharamaleki, Saba Ghaffary, Abolghasem Jouyban

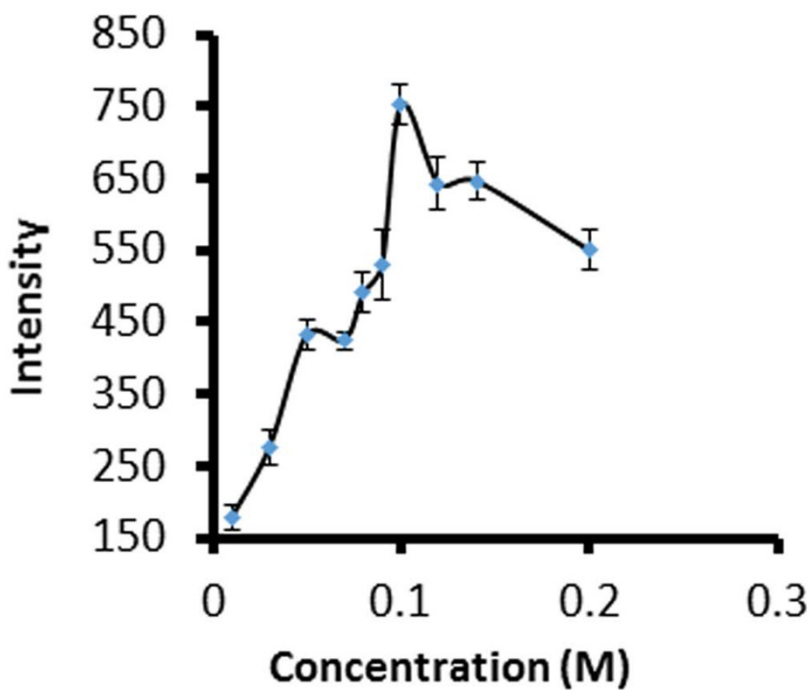

**Fig. S1.** Effect of buffer (Tris) concentration. Conditions: DEF, 100  $\mu$ L of 1 mg/L; Tb<sup>3+</sup>, 30  $\mu$ L of 0.01 M; AgNPs, 90  $\mu$ L of  $2.33 \times 10^{-4}$  M; Temperature (0°C).

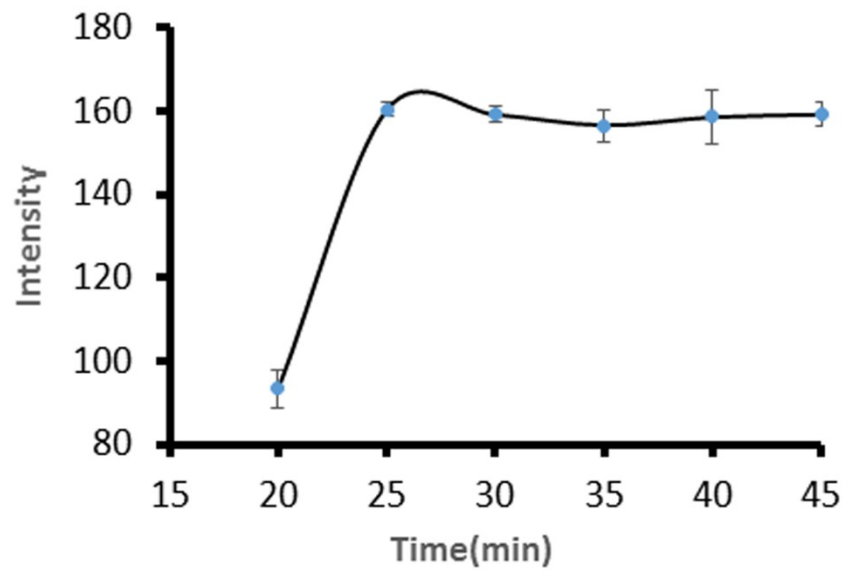

**Fig. S2.** Effect of time on the fluorescence intensity. Conditions: DEF, 100  $\mu\text{L}$  of 1 mg/L;  $\text{Tb}^{3+}$ , 30  $\mu\text{L}$  of 0.01 M; Tris, 100  $\mu\text{L}$  of 0.1 M; pH=7.5; AgNPs, 10  $\mu\text{L}$  of  $2.33 \times 10^{-4}$  M; Temperature ( $0^\circ\text{C}$ ).

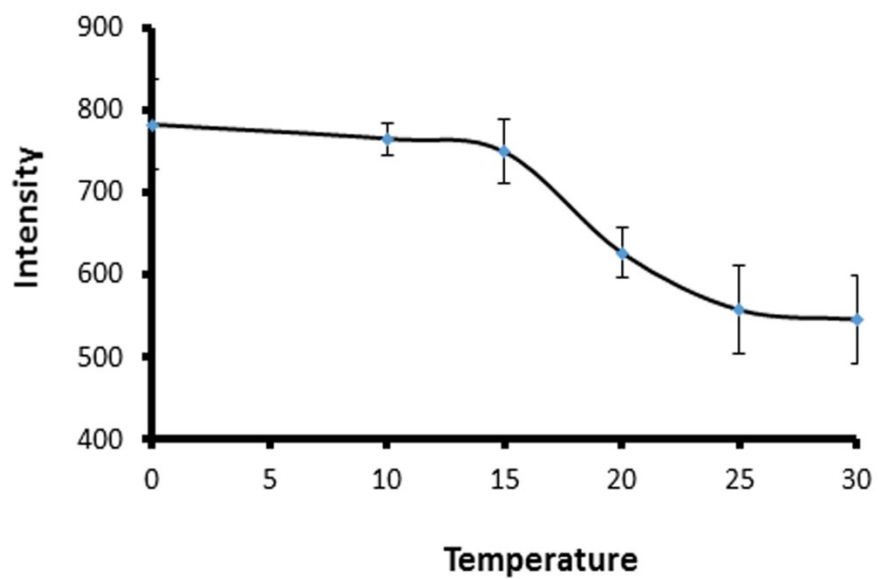

**Fig. S3.** Effect of temperature on the fluorescence intensity. Conditions: DEF, 100  $\mu\text{L}$  of 1 mg/L;  $\text{Tb}^{3+}$ , 30  $\mu\text{L}$  of 0.01 M; Tris, 100  $\mu\text{L}$  of 0.1 M; pH=7.5; AgNPs, 90  $\mu\text{L}$  of  $2.33 \times 10^{-4}$  M
